# Supplementary material for: Do school closures and school reopenings affect community transmission of COVID-19? A systematic review of observational studies
Source: PubMed Central journal article supplement — BMJ Open. 2021 Aug 17;11(8):e053371. doi: 10.1136/bmjopen-2021-053371 (PMC8375447; doi:10.1136/bmjopen-2021-053371), 2021-08-17
Supplement: bmjopen-2021-053371supp001.pdf [file bmjopen-2021-053371supp001.pdf]

## Appendix A – Search Strategy

**Search dates: 12/10/20 and 07/01/21**

### PubMed

Search Title/Abstract:

(coronavirus[mh] OR Coronavirus Infections[mh] OR coronavirus\*[tw] OR "COVID-19"[tw] or "2019-nCoV"[tw] or "SARS-CoV-2"[tw]) AND (Schools[mh:noexp] OR schools, nursery[mh] OR "Child Day Care Centers"[mh] OR "Nurseries, Infant"[mh] OR school\*[tiab] OR preschool\*[tiab] OR "pre-school\*" [tiab] OR nurser\*[tiab] OR kindergarten\*[tiab] OR "day care" [tiab] OR daycare [tiab] OR "education setting\*" [tiab] OR "educational setting\*" [tiab] OR NPI\*[tiab] OR "non-pharmaceutical intervention\*" [tiab])

### Web of Science

TS=(coronavirus\* OR "COVID-19" OR "2019-nCoV" OR "SARS-CoV-2")

AND

TS=(school\* OR nurser\* OR preschool\* OR "pre-school\*" OR kindergarten\* OR "day care" OR daycare OR "education setting\*" OR "educational setting\*" OR NPI\* OR "non-pharmaceutical intervention\*")

### Scopus

TITLE-ABS-KEY ( ( coronavirus\* OR "COVID-19" OR "2019-nCoV" OR "SARS-CoV-2" ) AND ( school\* OR nurser\* OR preschool\* OR "pre-school\*" OR kindergarten\* OR "day care" OR "daycare" OR "education setting\*" OR "educational setting\*" OR NPI\* OR "non-pharmaceutical intervention\*" ) ) AND ( LIMIT-TO ( PUBYEAR , 2020 ) )

### CINAHL (via HDAS)

((coronavirus\* OR "COVID-19" OR "2019-nCoV" OR "SARS-CoV-2") AND (school\* OR nurser\* OR preschool\* OR "pre-school\*" OR kindergarten\* OR "day care" OR "daycare" OR "education setting\*" OR "educational setting\*" OR NPI\* OR "non-pharmaceutical intervention\*")).ti,ab [DT 2020-2020]

### WHO Global COVID-19 Research Database

(tw:(school\*)) OR (tw:(nurser\*)) OR (tw:( "pre-school\*" )) OR (tw:(preschool\*)) OR (tw:(kindergarten\*)) OR tw:( "day care" ) OR tw:( "daycare" ) OR tw:( "education setting\*" ) OR tw:( "educational setting\*" ) OR tw:(NPI\*) OR tw:( "non-pharmaceutical intervention\*" )

Including: WHO COVID Database, MedRxiv. Title, abstract, subject. 2020.

**ERIC**

Coronavirus OR "COVID-19" or "2019-nCoV" or "SARS-CoV-2"

**British Education Index**

Coronavirus OR "COVID-19" or "2019-nCoV" or "SARS-CoV-2"

**Australian Education Index**

Coronavirus OR "COVID-19" or "2019-nCoV" or "SARS-CoV-2"

**Grey Literature Search, Google**

First 100 hits on google search, limiting to PDF files, up to 'last year'.

Search: "COVID-19" OR "coronavirus" OR "school" OR "education"
